# Supplementary material for: Highly boosted energy storage performance of few-layered MoS2 utilized for improved electrode fabrication: experimental and theoretical studies
Source: Royal Society of Chemistry journal article supplement (doi:10.1039/d4ta01713g), 2024-01-01
Supplement: d4ta01713g1.pdf [file d4ta01713g1.pdf]

## Highly Boosted Energy Storage Performance of Few-Layered MoS<sub>2</sub> Utilized by Improved Electrode Fabrication: Experimental and Theoretical Studies

Zeyad M. Abdulhamid<sup>a,c</sup>, A.C. Lokhande<sup>b</sup>, Adewale H. Pasanaje<sup>a</sup>, Daniel Choi<sup>b</sup>, Nirpendra Singh<sup>a</sup>, Kyriaki Polychronopoulou<sup>b</sup>, and Dalaver H. Anjum<sup>a\*</sup>

<sup>a</sup>Department of Physics, Khalifa University of Science and Technology, Abu Dhabi 127788, United Arab Emirates

<sup>b</sup>Department of Mechanical Engineering, Khalifa University of Science and Technology, Abu Dhabi 127788, United Arab Emirates.

<sup>c</sup>Department of Physics, Faculty of Science, Ain Shams University, Cairo 11566, Egypt.

Zeyad M. Abdulhamid, <https://orcid.org/0000-0001-7933-9821>

A.C. Lokhande, <https://orcid.org/0000-0002-2973-2876>

Adewale H. Pasanaje, <https://orcid.org/0000-0001-5046-9059>

Daniel Choi, <https://orcid.org/0000-0001-8868-909X>

Nirpendra Singh, <https://orcid.org/0000-0001-8043-0403>

Kyriaki Polychronopoulou, <https://orcid.org/0000-0002-0723-9941>

Dalaver H. Anjum, <https://orcid.org/0000-0003-2336-2859>

\*Corresponding author.

Email address: [dalaver.anjum@ku.ac.ae](mailto:dalaver.anjum@ku.ac.ae) (Dalaver H Anjum)

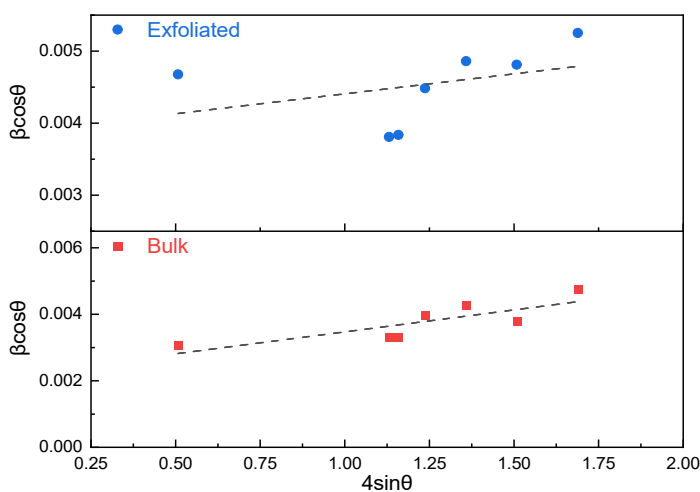

Figure S1 Williamson-Hall plot of bulk and exfoliated MoS<sub>2</sub>.

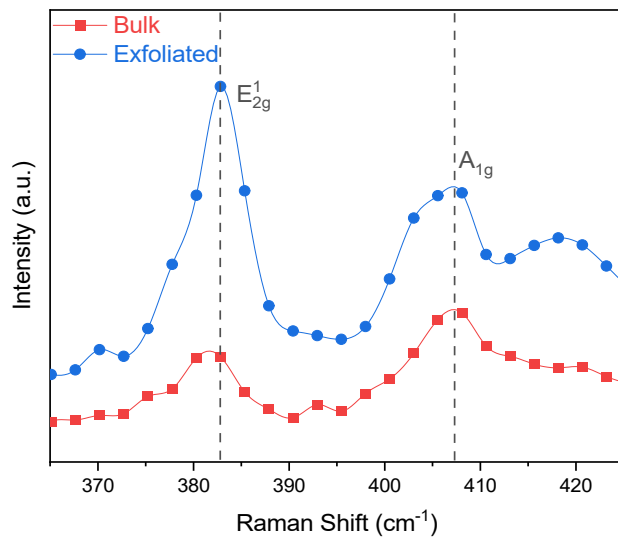

Figure S2 Raman spectrum of bulk and exfoliated MoS<sub>2</sub>.

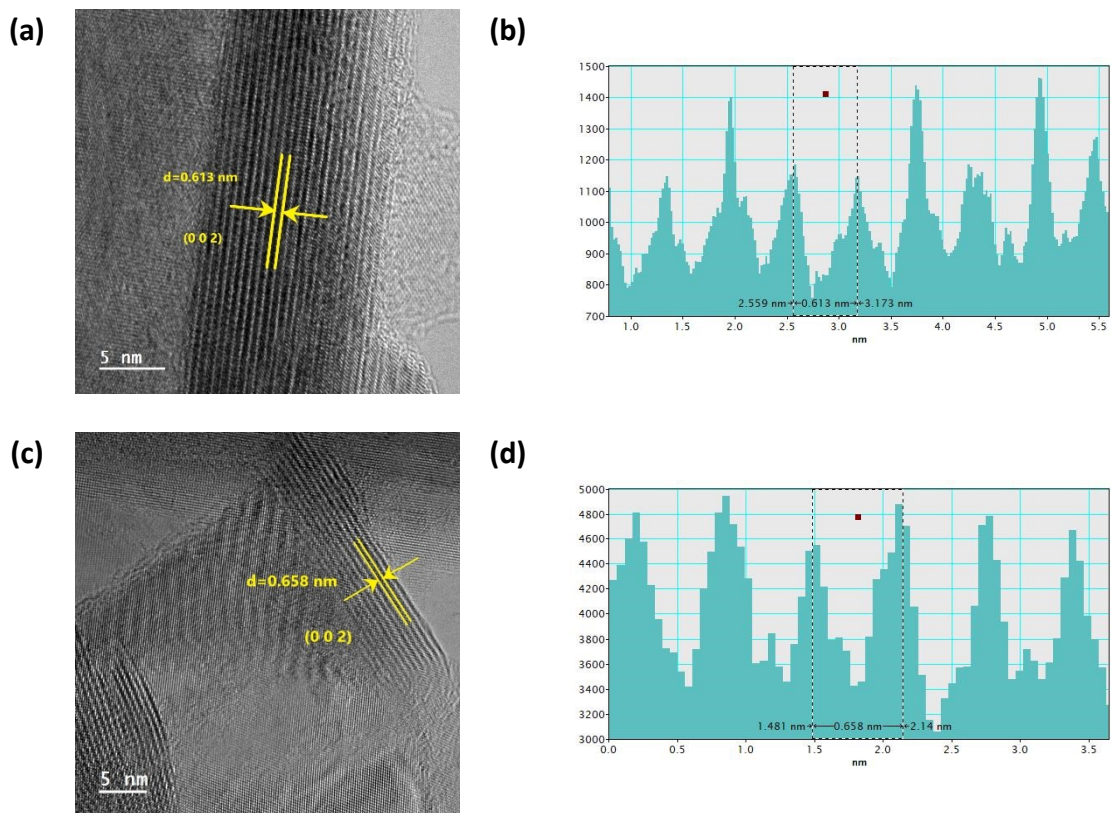

Figure S3 HRTEM and live profile of (a,b) bulk and (c,d) exfoliated MoS<sub>2</sub>, respectively.

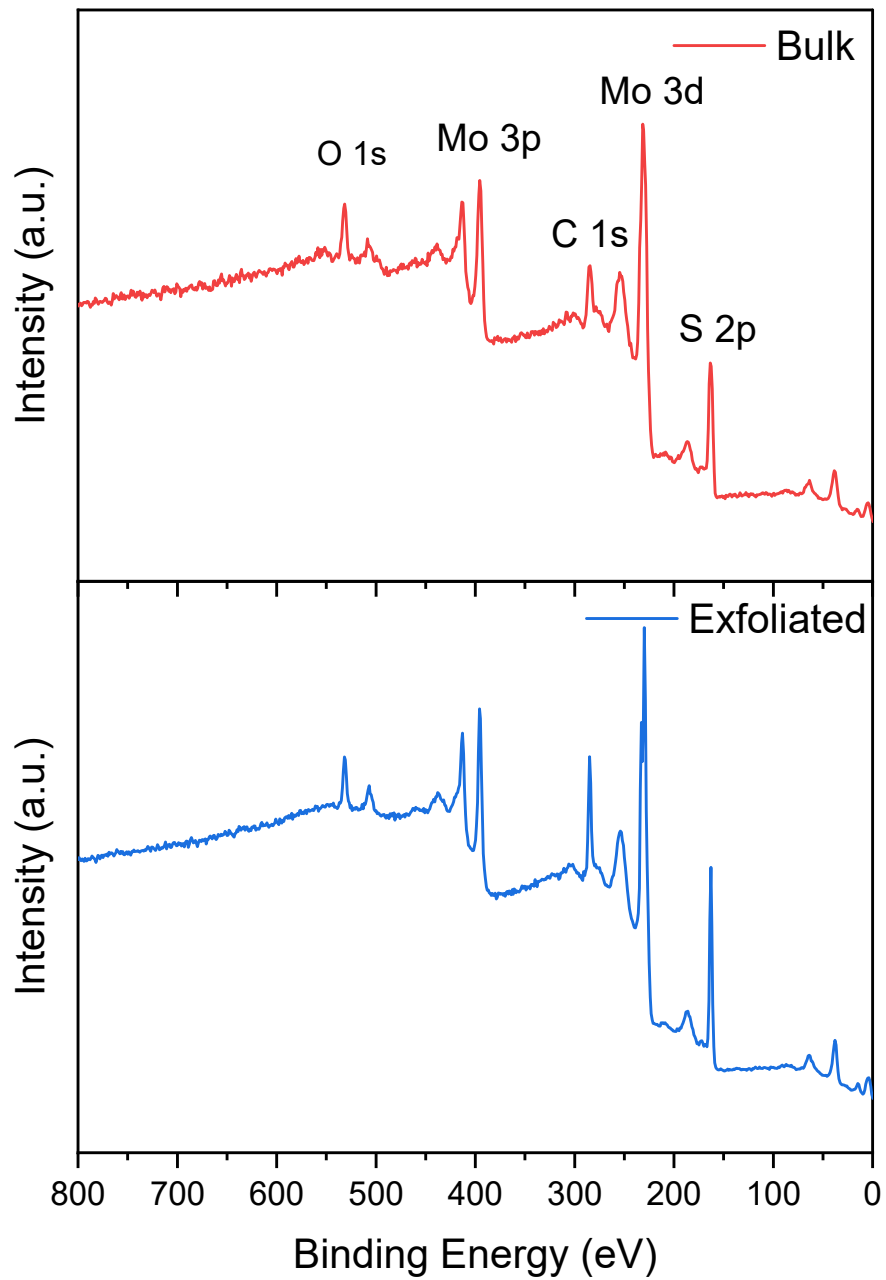

Figure S4 XPS survey spectra of bulk and exfoliated MoS<sub>2</sub>.

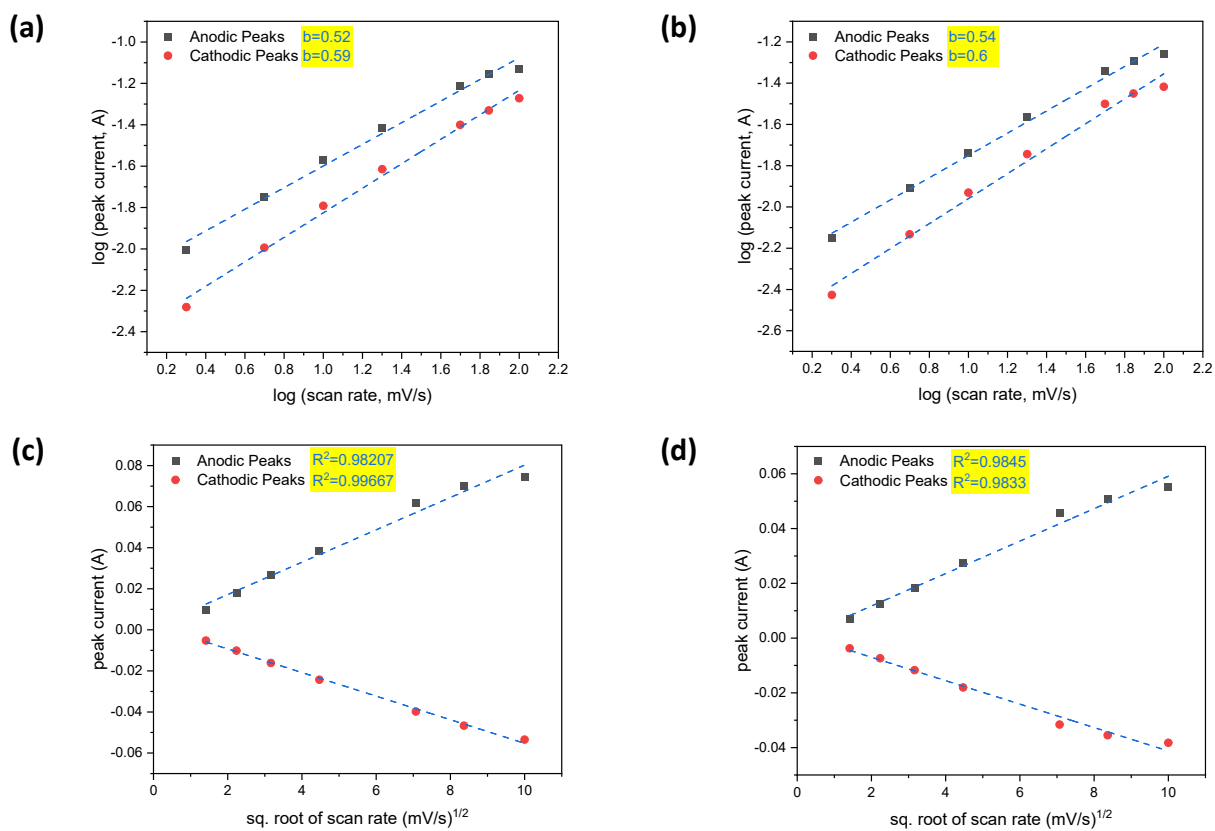

Figure S5 (a,b) log peak current vs. log scan rate and (c,d) peak current vs. square root of scan rate for bulk and exfoliated MoS<sub>2</sub>, respectively.

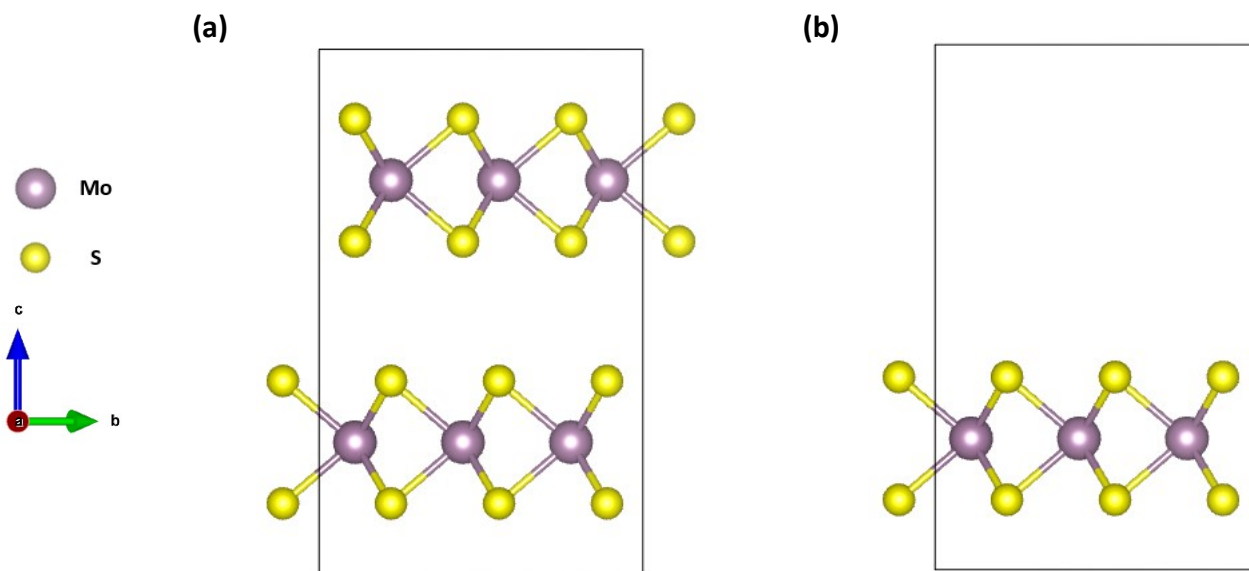

Figure S6 Optimized crystal structure of 2H-MoS<sub>2</sub> (a) bulk and (b) monolayer.
